# Supplementary material
Source: PubMed Central journal article supplement (PMC4194111)
Supplement: embj0033-0862-sd5.pdf [file embj0033-0862-sd5.pdf]

**Figure S5**

**A**

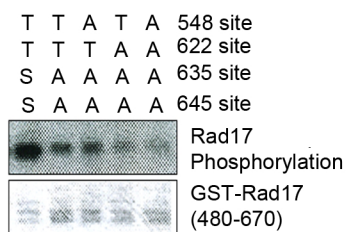

**B**

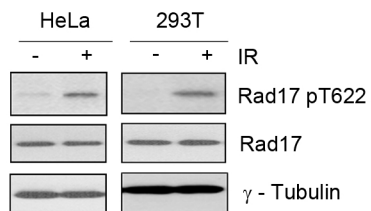

**C**

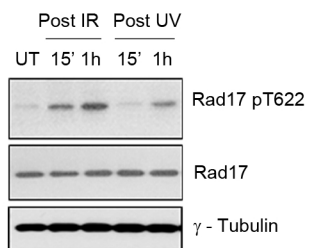

**D**

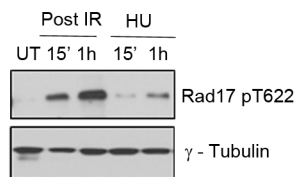

**Figure S5** Thr622 site is phosphorylated mainly by IR in human cells. **(A)** An *in vitro* ATR kinase assay was performed as described in supplementary materials and methods. **(B)** Thr622 residue is phosphorylated in human cells after IR. HeLa and 293T cells were either untreated or exposed to 5Gy of IR (1 hour prior to cell harvest). Western blot was performed as indicated. A specific phospho-antibody against Thr622 site was produced by Open Biosystems. **(C and D)** Comparison of Thr622 phosphorylation levels after IR, UV or HU treatment. U2OS cells were either left untreated or exposed to IR (5 Gy) or UV (50 J/M<sup>2</sup>) **(C)** or HU (1 mM) **(D)**. Cell lysates prepared at the indicated times were blotted as indicated.
