# Supplementary material
Source: PubMed Central journal article supplement (PMC4194111)
Supplement: embj0033-0862-sd6.pdf [file embj0033-0862-sd6.pdf]

**Figure S6**

**A**

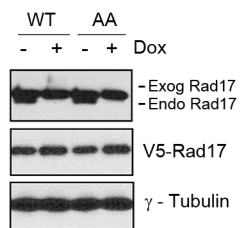

**B**

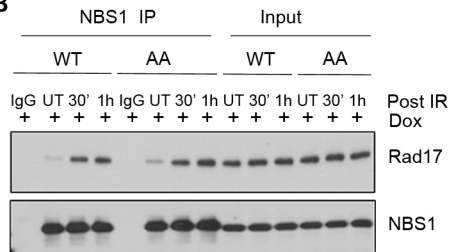

**Figure S6** Rad17 phosphorylation at Ser635/645 sites has no effect on Rad17-NBS1 interaction. **(A)** Inducible Rad17 knockdown cells (U2OS) stably expressing shRNA-resistant Rad17 WT or Rad17 AA mutant (Ser635A/Ser645A) were either untreated or treated with Dox for two days. Western blotting was performed as indicated. Dox induced a down-regulation of endogenous Rad17. **(B)** Rad17 Ser635/645 phosphorylation is dispensable for its interaction with NBS1. Inducible Rad17 knockdown cells (U2OS) stably expressing shRNA-resistant Rad17 WT or Rad17 AA mutant treated with Dox for two days were either untreated or exposed to 5 Gy of IR. Cell lysates prepared at the indicated times were subjected to immunoprecipitation with anti-NBS1. Western blot was performed as indicated.
