# Supplementary material
Source: PubMed Central journal article supplement (PMC4194111)
Supplement: embj0033-0862-sd8.pdf [file embj0033-0862-sd8.pdf]

**Figure S8**

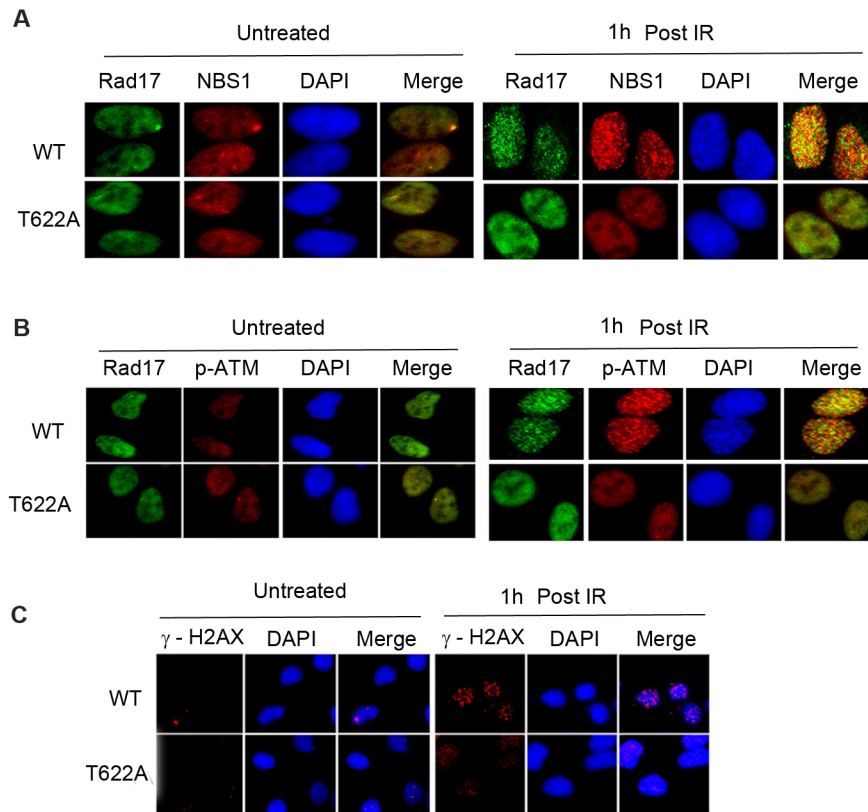

**Figure S8** Rad17 phosphorylation at Thr622 is essential for the foci formation of NBS1, p-ATM and  $\gamma$ -H2AX. **(A-C)** Thr622 phosphorylation is required for NBS1, p-ATM and  $\gamma$ -H2AX recruitment to DSBs. Inducible Rad17 knockdown cells (U2OS) stably expressing shRNA-resistant Rad17 WT or Rad17 T622A mutant treated with Dox for two days were either left untreated or exposed to 5 Gy of IR. Cells were fixed and stained with anti-Rad17 and anti-NBS1 **(A)**, anti-p-ATM **(B)** or anti- $\gamma$ -H2AX **(C)** as indicated.
