# Supplementary material
Source: PubMed Central journal article supplement (PMC4194111)
Supplement: embj0033-0862-sd10.pdf [file embj0033-0862-sd10.pdf]

Manuscript EMBO-2013-86064

## **Rad17 recruits the MRE11-RAD50-NBS1 complex to regulate the cellular response to DNA double-strand breaks**

Qinhong Wang, Peter Alexander, Michael Goldstein, Timothy P. Wakeman, Tao Sun, Junjie Feng, Zhenkun Lou, Michael B. Kastan and Xiao-Fan Wang

*Corresponding author: Xiao-Fan Wang, Duke University*

---

### **Review timeline:**

Submission date:

23 June 2013

Accepted:

08 January 2014

---

*Editor: Hartmut Vodermaier*

No Peer Review Process File is available with this article, as the authors have chosen not to make the review process public in this case.
