# Supplementary material
Source: PubMed Central journal article supplement (PMC4194111)

**Figure 1** Original data

**A**

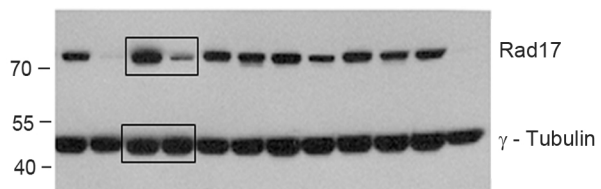

**D**

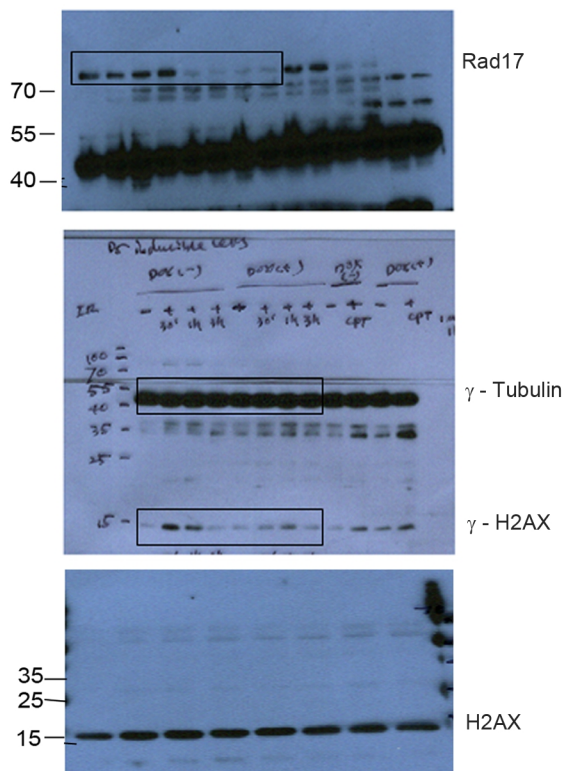

Supplement: embj0033-0862-sd11.pdf [file embj0033-0862-sd11.pdf]

**Figure 2** Original data

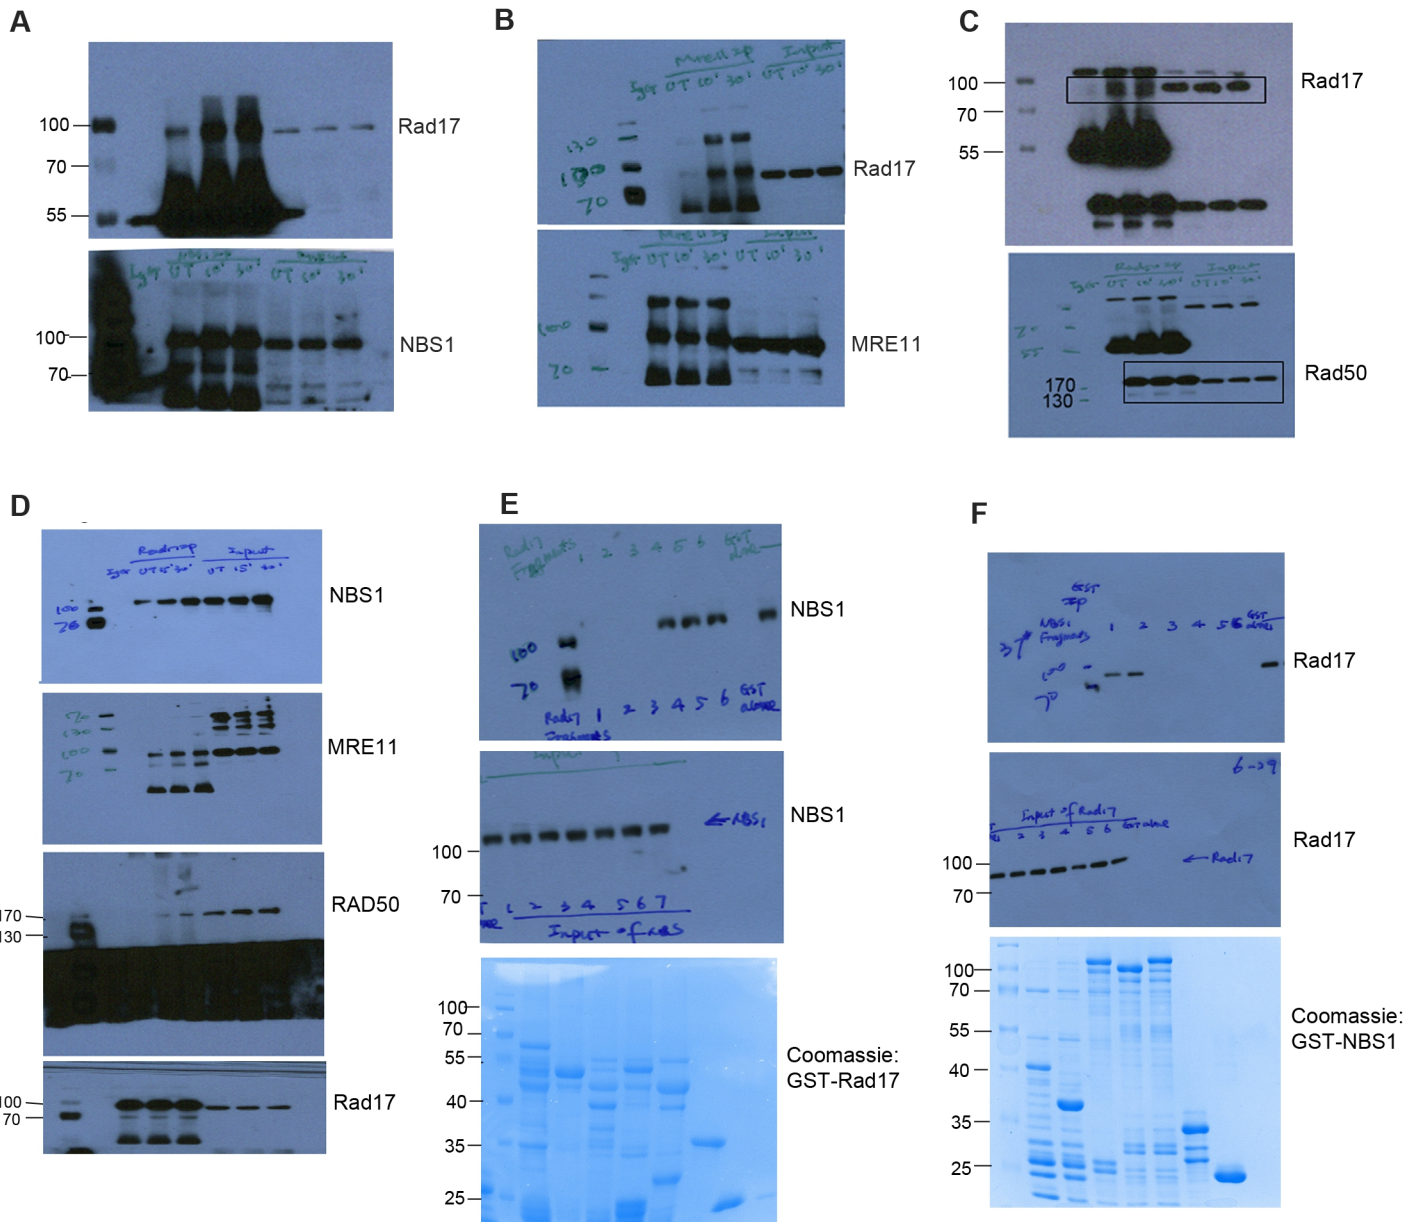

Supplement: embj0033-0862-sd12.pdf [file embj0033-0862-sd12.pdf]

**Figure 5** Original data

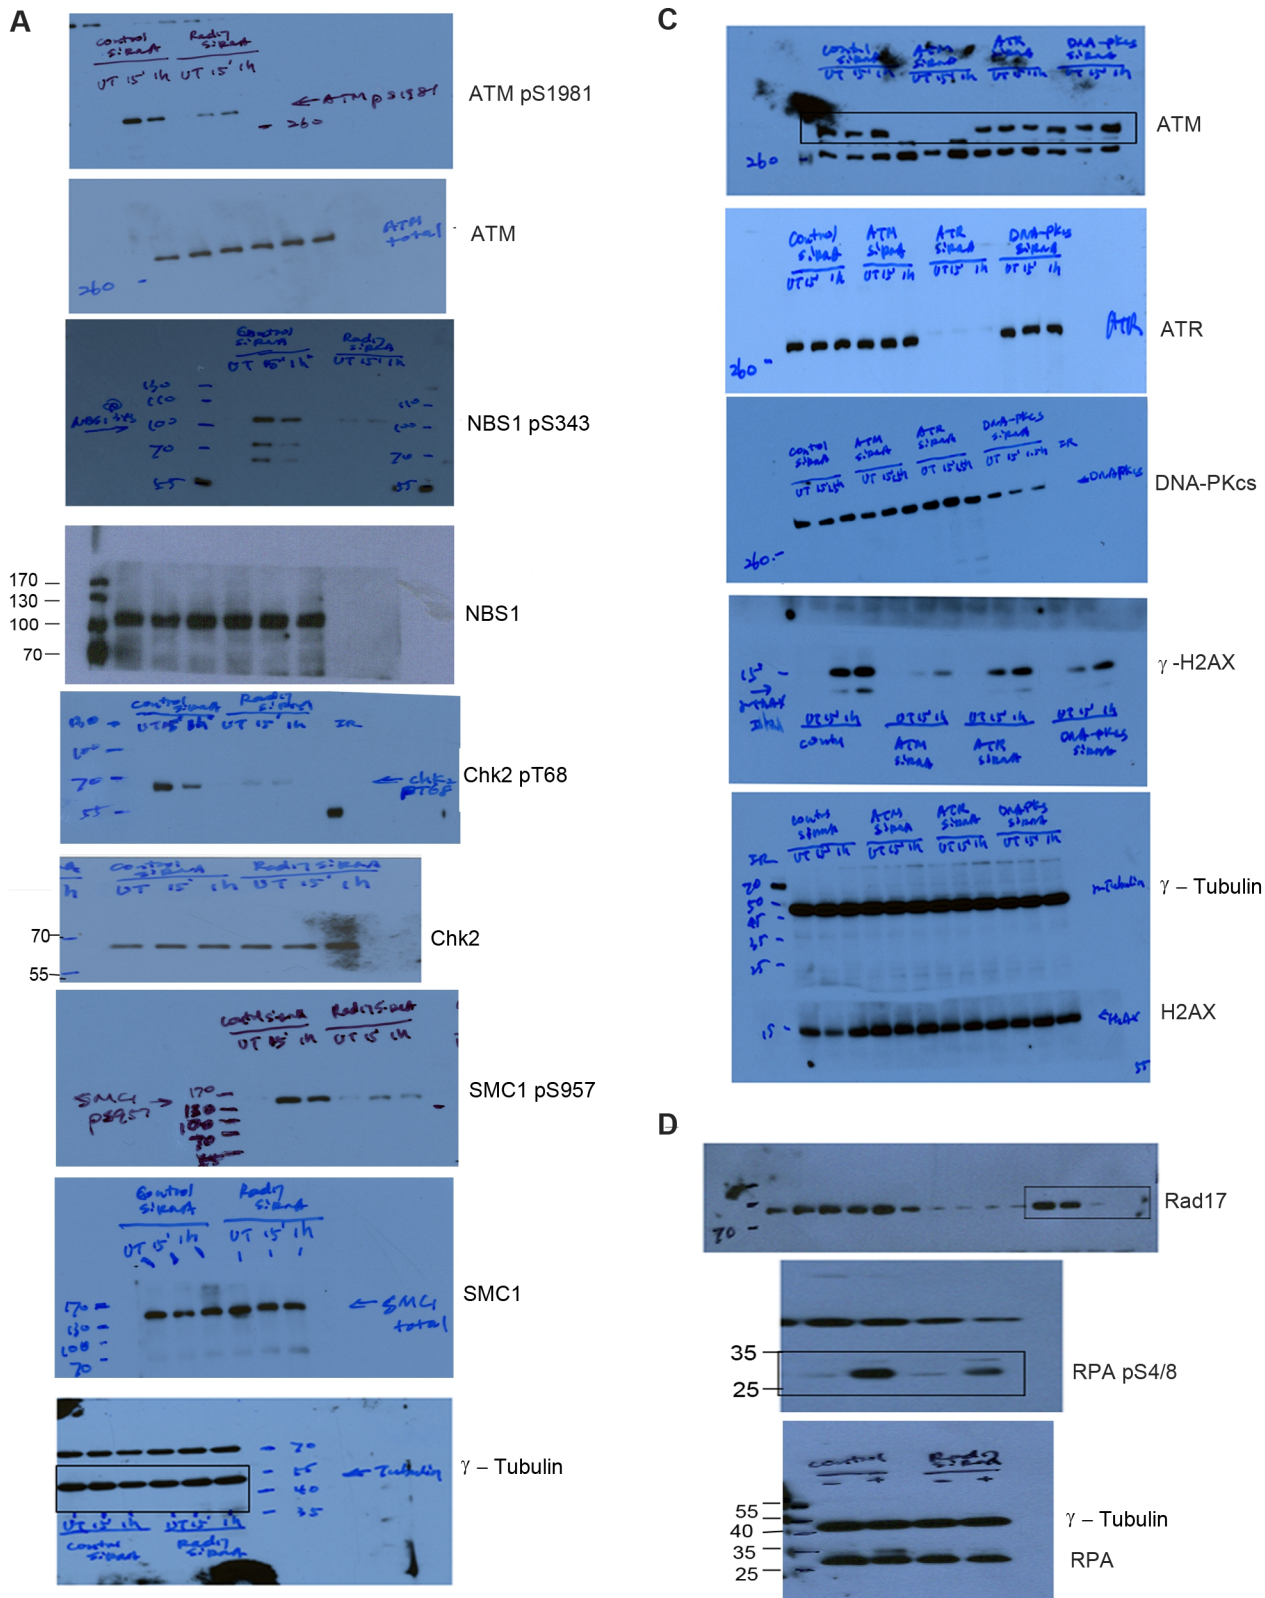

**Figure 5** Original data continued

**G**

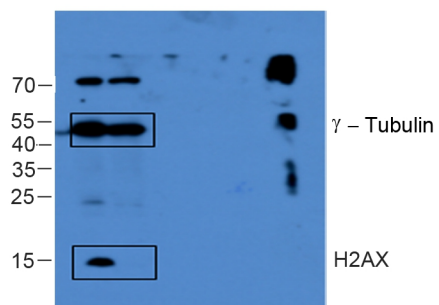

**H**

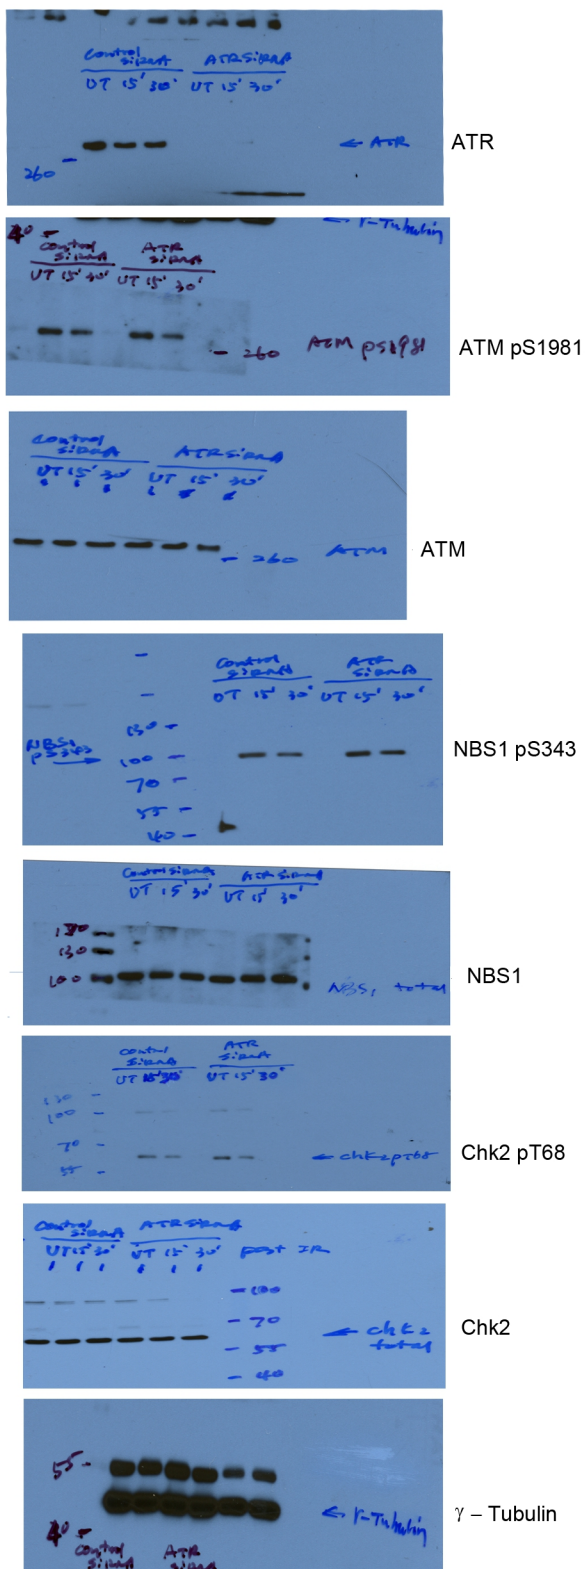

Supplement: embj0033-0862-sd15.pdf [file embj0033-0862-sd15.pdf]

**Figure 8** Original data

**A**

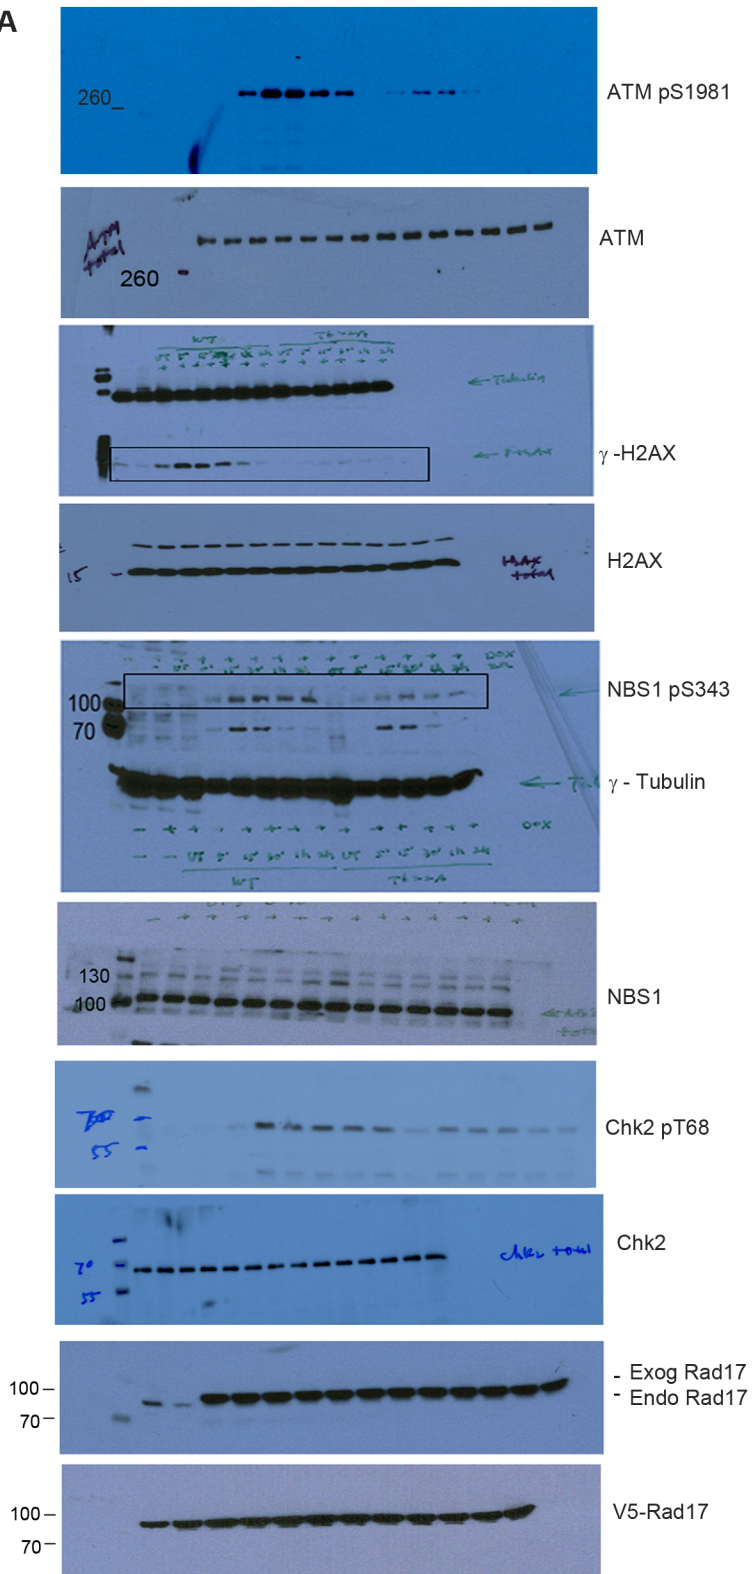

**E**

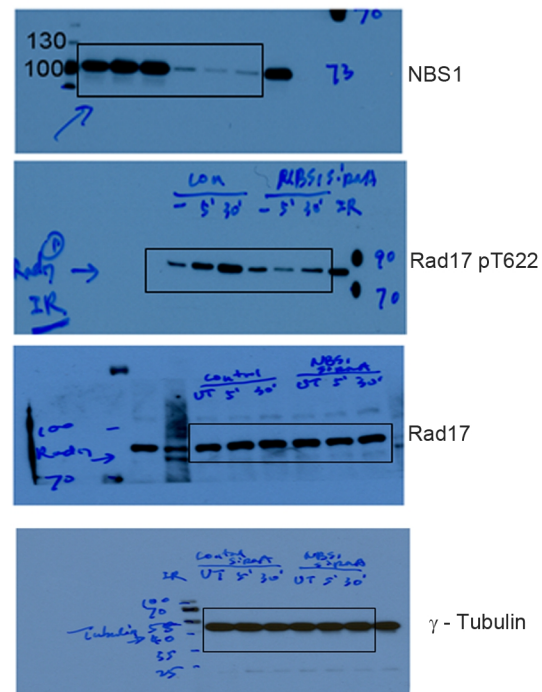

Supplement: embj0033-0862-sd18.pdf [file embj0033-0862-sd18.pdf]
